# Supplementary material for: Promoción profesional, movilidad funcional, movilidad geográfica y modificación sustancial
Source: Royal Society of Chemistry journal article supplement (doi:10.1039/c6dt02378a), 1995-01-01
Supplement: c6dt02378a5.pdf [file c6dt02378a5.pdf]

## Supplementary data

### Triple molybdate scheelite-type upconversion phosphor

### **NaCaLa(MoO<sub>4</sub>)<sub>3</sub>:Er<sup>3+</sup>/Yb<sup>3+</sup>: structural and spectroscopic properties**

Chang Sung Lim<sup>1</sup>, Aleksandr S. Aleksandrovsky<sup>2,3</sup>, Maxim S. Molokeev<sup>4,5</sup>,

Aleksandr S. Oreshonkov<sup>6,7</sup>, Denis A. Ikonnikov<sup>7</sup>, Victor V. Atuchin<sup>8,9,10,11,\*</sup>

<sup>1</sup>Department of Advanced Materials Science & Engineering, Hanseo University, Seosan 356-706, Republic of Korea

<sup>2</sup>Laboratory of Coherent Optics, Kirensky Institute of Physics, SB RAS, Krasnoyarsk 660036, Russia

<sup>3</sup>Laboratory for Nonlinear Optics and Spectroscopy, Siberian Federal University, Krasnoyarsk 660079, Russia

<sup>4</sup>Laboratory of Crystal Physics, Kirensky Institute of Physics, SB RAS, Krasnoyarsk 660036, Russia

<sup>5</sup>Department of Physics, Far Eastern State Transport University, Khabarovsk 680021, Russia

<sup>6</sup>Laboratory of Molecular Spectroscopy, Kirensky Institute of Physics, SB RAS, Krasnoyarsk 660036, Russia

<sup>7</sup>Department of Photonics and Laser Technologies, Siberian Federal University, Krasnoyarsk 660079, Russia

<sup>8</sup>Laboratory of Optical Materials and Structures, Institute of Semiconductor Physics, SB RAS, Novosibirsk 630090, Russia

<sup>9</sup>Functional Electronics Laboratory, Tomsk State University, Tomsk 634050, Russia

<sup>10</sup>Laboratory of Semiconductor and Dielectric Materials, Novosibirsk State University,  
Novosibirsk 630090, Russia

<sup>11</sup>Institute of Chemistry, Tyumen State University, Tyumen 525003, Russia

**Table 1S.** Fractional atomic coordinates and isotropic displacement parameters ( $\text{\AA}^2$ ) of NCLM: $x\text{Er}^{3+}$ , $y\text{Yb}^{3+}$  samples

|                                                 | $x$       | $y$       | $z$        | $B_{\text{iso}}$ | Occ. |
|-------------------------------------------------|-----------|-----------|------------|------------------|------|
| NCLM                                            |           |           |            |                  |      |
| Na                                              | 0         | 1/4       | 5/8        | 0.8 (2)          | 1/3  |
| Ca                                              | 0         | 1/4       | 5/8        | 0.8 (2)          | 1/3  |
| La                                              | 0         | 1/4       | 5/8        | 0.8 (2)          | 1/3  |
| Mo                                              | 0         | 1/4       | 1/8        | 0.5 (2)          | 1    |
| O                                               | 0.253 (2) | 0.119 (2) | 0.0450 (8) | 0.5 (3)          | 1    |
| NCLM:0.2Er <sup>3+</sup>                        |           |           |            |                  |      |
| Na                                              | 0         | 1/4       | 5/8        | 0.7 (2)          | 1/3  |
| Ca                                              | 0         | 1/4       | 5/8        | 0.7 (2)          | 1/3  |
| La                                              | 0         | 1/4       | 5/8        | 0.7 (2)          | 4/15 |
| Er                                              | 0         | 1/4       | 5/8        | 0.7 (2)          | 1/15 |
| Mo                                              | 0         | 1/4       | 1/8        | 0.5 (2)          | 1    |
| O                                               | 0.240 (2) | 0.108 (1) | 0.0436 (7) | 0.5 (3)          | 1    |
| NCLM:0.1Er <sup>3+</sup> ,0.2Yb <sup>3+</sup>   |           |           |            |                  |      |
| Na                                              | 0         | 1/4       | 5/8        | 0.6 (2)          | 1/3  |
| Ca                                              | 0         | 1/4       | 5/8        | 0.6 (2)          | 1/3  |
| La                                              | 0         | 1/4       | 5/8        | 0.6 (2)          | 7/30 |
| Er                                              | 0         | 1/4       | 5/8        | 0.6 (2)          | 1/30 |
| Yb                                              | 0         | 1/4       | 5/8        | 0.6 (2)          | 2/30 |
| Mo                                              | 0         | 1/4       | 1/8        | 0.5 (2)          | 1    |
| O                                               | 0.241 (2) | 0.103 (1) | 0.0399 (6) | 0.8 (3)          | 1    |
| NCLM:0.05Er <sup>3+</sup> ,0.45Yb <sup>3+</sup> |           |           |            |                  |      |
| Na                                              | 0         | 1/4       | 5/8        | 0.5 (2)          | 1/3  |

|    |           |           |            |         |       |
|----|-----------|-----------|------------|---------|-------|
| Ca | 0         | 1/4       | 5/8        | 0.5 (2) | 1/3   |
| La | 0         | 1/4       | 5/8        | 0.5 (2) | 10/60 |
| Er | 0         | 1/4       | 5/8        | 0.5 (2) | 1/60  |
| Yb | 0         | 1/4       | 5/8        | 0.5 (2) | 9/60  |
| Mo | 0         | 1/4       | 1/8        | 0.5 (2) | 1     |
| O  | 0.241 (2) | 0.102 (1) | 0.0420 (6) | 0.5 (3) | 1     |

**Table 2S.** Main bond lengths (Å) of NCLM: $x\text{Er}^{3+}$ , $y\text{Yb}^{3+}$  samples

| NCLM                                            |           |      |           |
|-------------------------------------------------|-----------|------|-----------|
| (Na/Ca/La)—O <sup>i</sup>                       | 2.53 (1)  | Mo—O | 1.77 (1)  |
| (Na/Ca/La)—O <sup>ii</sup>                      | 2.47 (1)  |      |           |
| NCLM:0.2Er <sup>3+</sup>                        |           |      |           |
| (Na/Ca/La/Er)—O <sup>i</sup>                    | 2.518 (9) | Mo—O | 1.749 (9) |
| (Na/Ca/La/Er)—O <sup>ii</sup>                   | 2.502 (9) |      |           |
| NCLM:0.1Er <sup>3+</sup> ,0.2Yb <sup>3+</sup>   |           |      |           |
| (Na/Ca/La/Er/Yb)—O <sup>i</sup>                 | 2.505 (9) | Mo—O | 1.782 (9) |
| (Na/Ca/La/Er/Yb)—O <sup>ii</sup>                | 2.467 (9) |      |           |
| NCLM:0.05Er <sup>3+</sup> ,0.45Yb <sup>3+</sup> |           |      |           |
| (Na/Ca/La/Er/Yb)—O <sup>i</sup>                 | 2.482 (9) | Mo—O | 1.760 (9) |
| (Na/Ca/La/Er/Yb)—O <sup>ii</sup>                | 2.474 (8) |      |           |

Symmetry codes: (i)  $-x+1/2, -y, z+1/2$ ; (ii)  $-x+1/2, -y+1/2, -z+1/2$ .

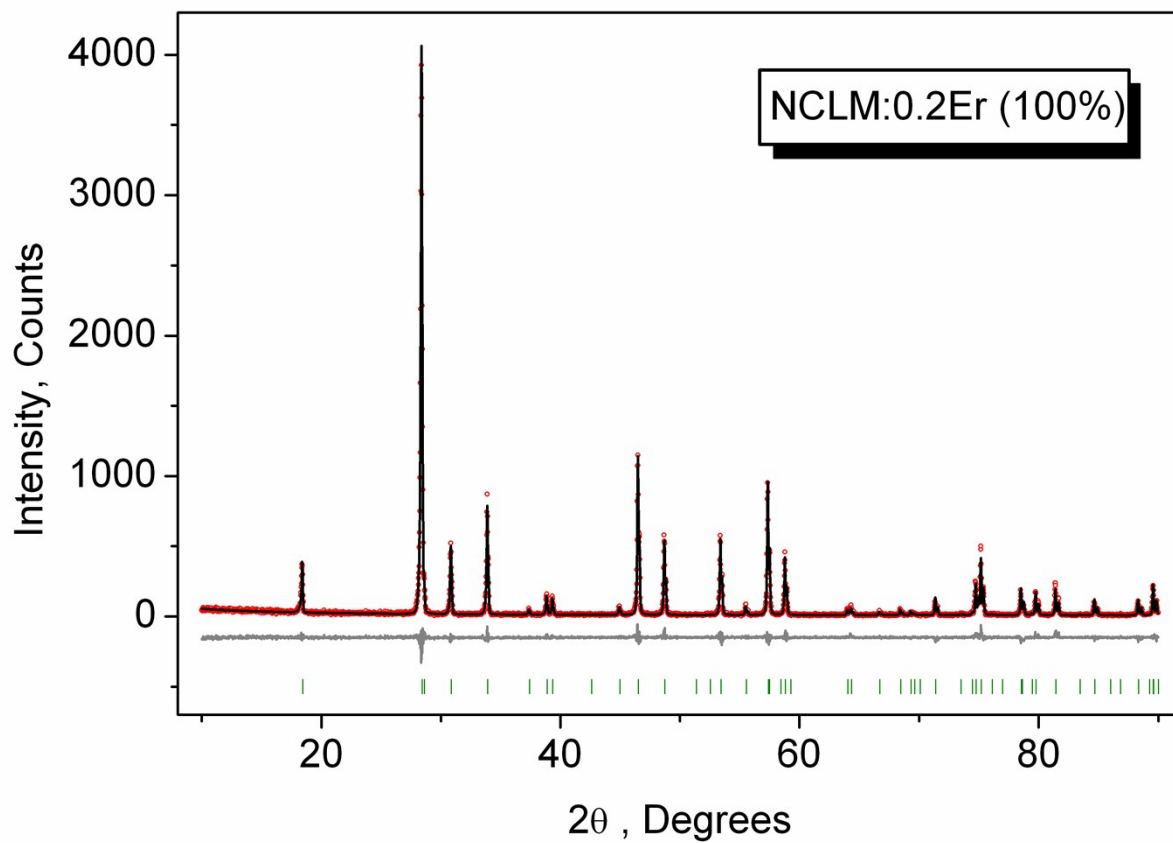

**Figure 1S.** Difference Rietveld plot of NCLM:0.2Er<sup>3+</sup>.

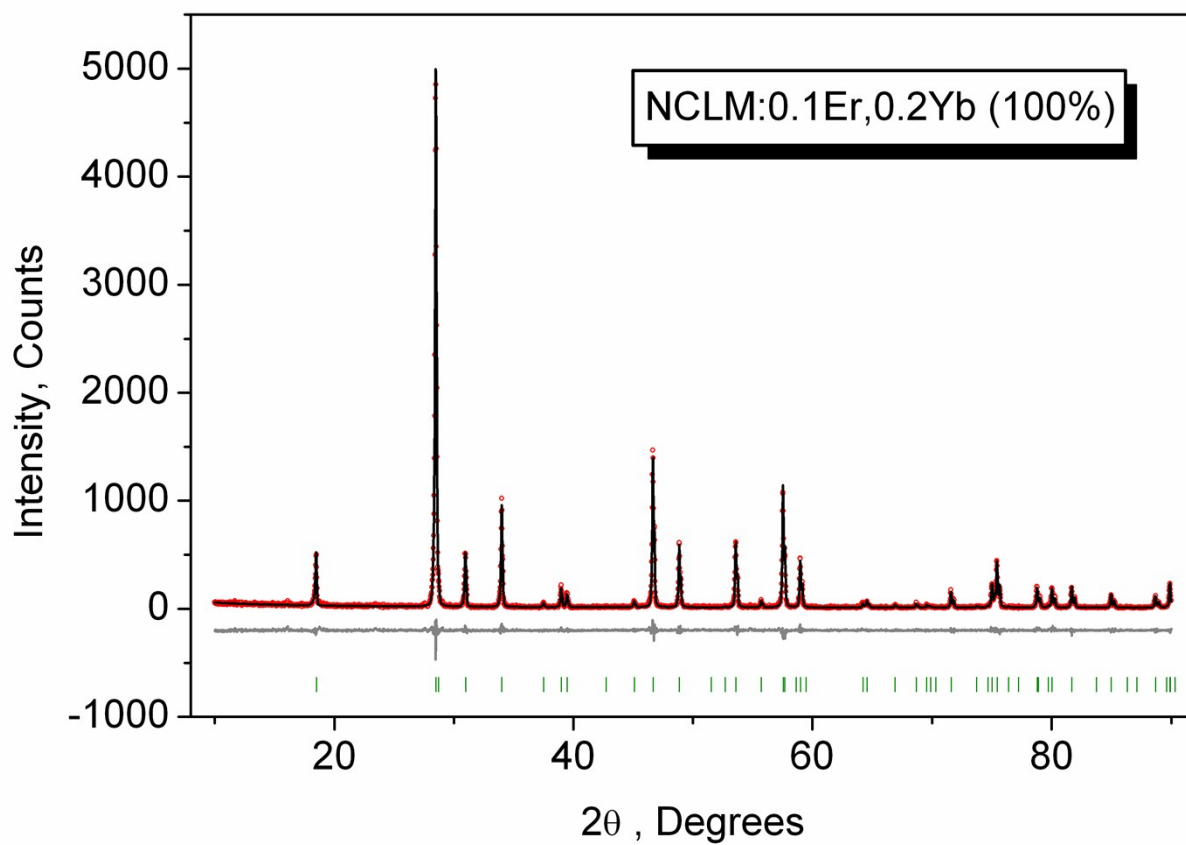

**Figure 2S.** Difference Rietveld plot of NCLM:0.1Er<sup>3+</sup>,0.2Yb<sup>3+</sup>.

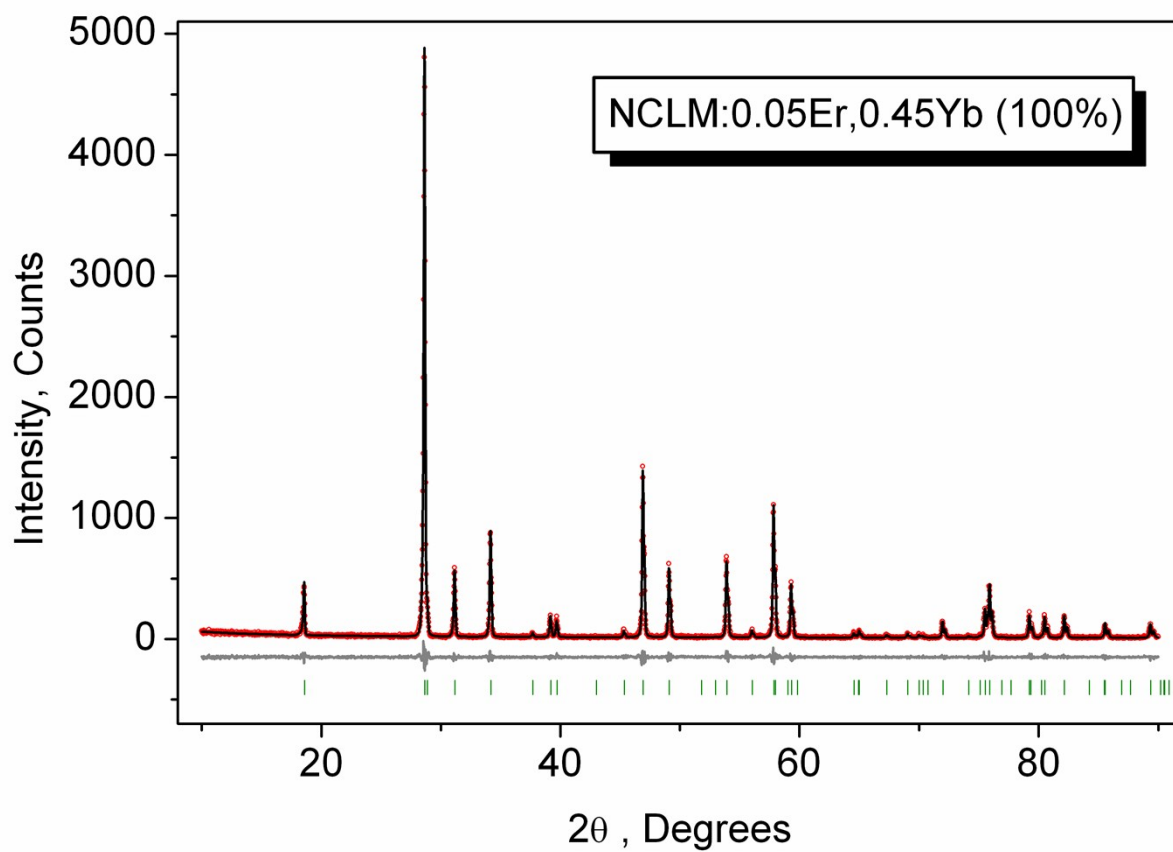

**Figure 3S.** Difference Rietveld plot of NCLM:0.05Er<sup>3+</sup>,0.45Yb<sup>3+</sup>.

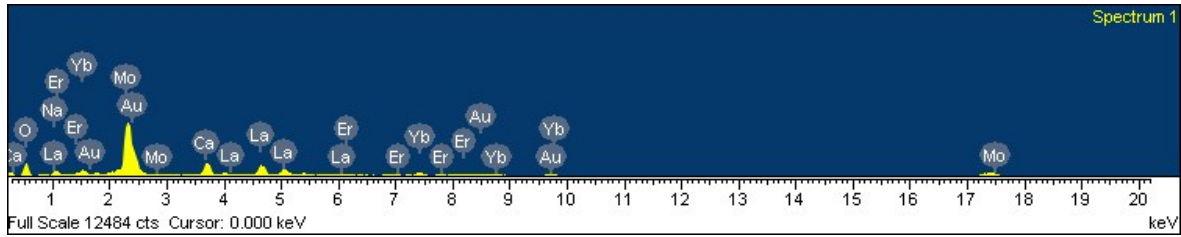

**Figure 4S.** Energy-dispersive X-ray spectroscopy patterns of the synthesized NCLM:0.1Er<sup>3+</sup>,0.2Yb<sup>3+</sup> particles.

**Table 3S.** Quantitative compositions of NCLM:0.1Er<sup>3+</sup>,0.2Yb<sup>3+</sup> sample

| Spectrum       | In stats. | O     | Na   | Ca   | Mo    | La    | Er   | Yb   | Total  |
|----------------|-----------|-------|------|------|-------|-------|------|------|--------|
| Spectrum 1     | Yes       | 31.99 | 2.59 | 4.65 | 37.48 | 13.35 | 2.51 | 7.43 | 100.00 |
| Spectrum 2     | Yes       | 31.53 | 2.88 | 4.56 | 38.47 | 13.82 | 2.10 | 6.63 | 100.00 |
| Spectrum 3     | Yes       | 33.03 | 2.81 | 4.49 | 36.10 | 13.94 | 2.31 | 7.32 | 100.00 |
| Spectrum 4     | Yes       | 32.39 | 2.61 | 4.30 | 37.45 | 13.66 | 2.57 | 7.02 | 100.00 |
| Mean           |           | 32.24 | 2.72 | 4.50 | 37.37 | 13.69 | 2.37 | 7.10 | 100.00 |
| Std. deviation |           | 0.64  | 0.14 | 0.15 | 0.97  | 0.25  | 0.21 | 0.36 |        |
| Max.           |           | 33.03 | 2.88 | 4.65 | 38.47 | 13.94 | 2.57 | 7.43 |        |
| Min.           |           | 31.53 | 2.59 | 4.30 | 36.10 | 13.35 | 2.10 | 6.63 |        |
| Nominal values |           | 27.75 | 3.33 | 5.80 | 41.64 | 14.07 | 2.41 | 5.00 | 100.00 |

**Table 4S.** Parameters of the interatomic interaction potential

| Interaction   | Radii of interaction, Å | $\lambda$ , aJ/Å <sup>2</sup> | $\rho$ , Å |
|---------------|-------------------------|-------------------------------|------------|
| Na – O        | 0.0 – 3.0               | 574.03                        | 0.3183     |
| Ca – O        | 0.0 – 3.0               | 714.87                        | 0.2691     |
| La – O        | 0.0 – 3.0               | 786.35                        | 0.2240     |
| Mo – O        | 0.0 – 2.0               | 176.17                        | 0.4577     |
| O – O (intra) | 2.800 – 2.835           | 331.81                        | 0.4494     |
| O – O (intra) | 3.000 – 3.025           | 526.57                        | 0.4842     |
| O – O (inter) | 2.837 – 2.999           | 615.31                        | 0.3670     |
| O – O (inter) | 3.025 – 3.100           | 612.27                        | 0.3804     |
| O – O (inter) | 3.110 – 3.160           | 549.39                        | 0.3434     |



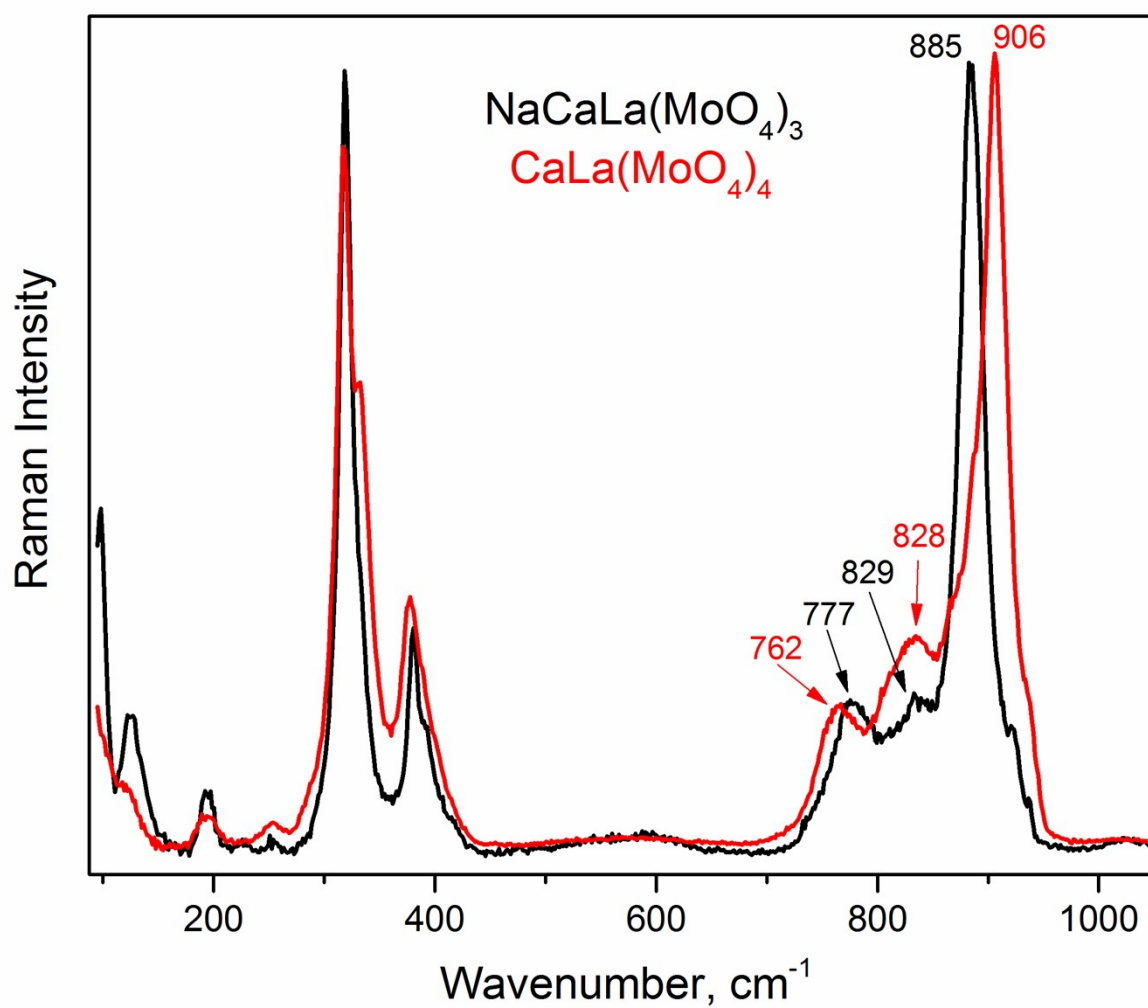

**Figure 5S.** Comparison of Raman spectra of pure NCLM and CaLa<sub>2</sub>(MoO<sub>4</sub>)<sub>4</sub> [42].
